# Supplementary material for: Patterns of European Ant Communities Reveal a Functionally Coherent Holarctic Fauna
Source: MDPI journal article supplement (doi:10.3390/d15030341), 2023-02-27
Supplement: s1 [file s1]

Archive with 1 entries (1 files):
- diversity-2172848-supplementary.pdf
